# Supplementary material for: Blood Lead Concentration and Thyroid Function during Pregnancy: Results from the Yugoslavia Prospective Study of Environmental Lead Exposure
Source: PubMed Central journal article supplement (PMC4181923; doi:10.1289/ehp.1307669), 2014-05-27
Supplement: ehp.1307669.s001.508.pdf [file ehp.1307669.s001.508.pdf]

**Supplemental Material**

**Blood Lead Concentration and Thyroid Function during  
Pregnancy: Results from the Yugoslavia Prospective Study of  
Environmental Lead Exposure**

Linda G. Kahn, Xinhua Liu, Biljana Rajovic, Dusan Popovac, Sharon Oberfield, Joseph H.  
Graziano, and Pam Factor-Litvak

**Table S1.** Bivariate associations between participant characteristics and mid-pregnancy thyroid function parameters [BPb ( $\mu\text{g/dL}$ ), FT4 ( $\text{ng/dL}$ ), TSH ( $\mu\text{IU/mL}$ ), and TPO Ab ( $\text{IU/mL}$ )] among study participants.

| Characteristic                              | BPb n | BPb Mean $\pm$ SD | p-value <sup>a</sup> | FT4 n | FT4 Mean $\pm$ SD | p-value <sup>a</sup> | TSH n | TSH Mean $\pm$ SD | p-value <sup>a</sup> | TPO Ab n | TPO Ab Mean $\pm$ SD | p-value <sup>a</sup> |
|---------------------------------------------|-------|-------------------|----------------------|-------|-------------------|----------------------|-------|-------------------|----------------------|----------|----------------------|----------------------|
| <b>Town</b>                                 |       |                   | <0.0001              |       |                   | <0.0001              |       |                   | 0.99                 |          |                      | 0.0002               |
| Mitrovica                                   | 144   | 20.00 $\pm$ 6.99  |                      | 138   | 0.91 $\pm$ 0.17   |                      | 136   | 1.46 $\pm$ 0.91   |                      | 144      | 15.45 $\pm$ 33.08    |                      |
| Pristina                                    | 147   | 5.57 $\pm$ 2.01   |                      | 141   | 1.03 $\pm$ 0.16   |                      | 142   | 1.46 $\pm$ 0.68   |                      | 147      | 5.12 $\pm$ 6.38      |                      |
| <b>Ethnicity</b>                            | 291   |                   | 0.0019               | 279   |                   | <0.0001              | 278   |                   | 0.13                 | 291      |                      | 0.46                 |
| Albanian                                    | 184   | 11.48 $\pm$ 8.41  |                      | 178   | 0.99 $\pm$ 0.17   |                      | 177   | 1.52 $\pm$ 0.85   |                      | 184      | 9.06 $\pm$ 22.74     |                      |
| Serbian                                     | 71    | 13.86 $\pm$ 8.97  |                      | 67    | 0.89 $\pm$ 0.16   |                      | 68    | 1.38 $\pm$ 0.75   |                      | 71       | 13.29 $\pm$ 29.51    |                      |
| Other                                       | 36    | 16.77 $\pm$ 9.55  |                      | 34    | 1.02 $\pm$ 0.19   |                      | 33    | 1.26 $\pm$ 0.53   |                      | 36       | 10.24 $\pm$ 19.76    |                      |
| <b>Maternal education</b>                   | 291   |                   | 0.64                 | 279   |                   | 0.030                | 278   |                   | 0.34                 | 291      |                      | 0.62                 |
| None                                        | 16    | 13.51 $\pm$ 11.09 |                      | 16    | 1.08 $\pm$ 0.25   |                      | 16    | 1.15 $\pm$ 0.62   |                      | 16       | 12.24 $\pm$ 30.79    |                      |
| 1-8 years                                   | 113   | 11.88 $\pm$ 8.26  |                      | 109   | 0.98 $\pm$ 0.18   |                      | 108   | 1.53 $\pm$ 0.75   |                      | 113      | 8.11 $\pm$ 13.44     |                      |
| 9-12 years                                  | 143   | 13.27 $\pm$ 9.12  |                      | 135   | 0.95 $\pm$ 0.17   |                      | 135   | 1.44 $\pm$ 0.87   |                      | 143      | 11.93 $\pm$ 30.73    |                      |
| $\geq$ 13 years                             | 19    | 12.79 $\pm$ 8.44  |                      | 19    | 0.97 $\pm$ 0.12   |                      | 19    | 1.43 $\pm$ 0.63   |                      | 19       | 8.44 $\pm$ 5.72      |                      |
| <b>Prior live births</b>                    | 291   |                   | 0.075                | 279   |                   | 0.46                 | 278   |                   | 0.53                 | 291      |                      | 0.28                 |
| 0                                           | 88    | 14.39 $\pm$ 8.79  |                      | 86    | 0.97 $\pm$ 0.16   |                      | 83    | 1.54 $\pm$ 1.00   |                      | 88       | 13.66 $\pm$ 32.67    |                      |
| 1-2                                         | 143   | 11.66 $\pm$ 8.57  |                      | 139   | 0.96 $\pm$ 0.16   |                      | 141   | 1.42 $\pm$ 0.69   |                      | 143      | 8.50 $\pm$ 19.99     |                      |
| 3 or more                                   | 60    | 12.75 $\pm$ 9.34  |                      | 54    | 1.00 $\pm$ 0.23   |                      | 54    | 1.44 $\pm$ 0.73   |                      | 60       | 9.35 $\pm$ 17.95     |                      |
| <b>Pre-pregnancy BMI</b>                    | 289   |                   | 0.47                 | 277   |                   | 0.0081               | 276   |                   | 0.84                 | 289      |                      | 0.84                 |
| Normal ( $<$ 25 $\text{kg/m}^2$ )           | 165   | 12.34 $\pm$ 8.96  |                      | 156   | 1.00 $\pm$ 0.18   |                      | 157   | 1.48 $\pm$ 0.78   |                      | 165      | 9.54 $\pm$ 24.39     |                      |
| Overweight (25-29.9 $\text{kg/m}^2$ )       | 94    | 12.96 $\pm$ 8.73  |                      | 92    | 0.94 $\pm$ 0.16   |                      | 90    | 1.42 $\pm$ 0.86   |                      | 94       | 11.13 $\pm$ 26.67    |                      |
| Obese ( $\geq$ 30 $\text{kg/m}^2$ )         | 30    | 14.48 $\pm$ 8.75  |                      | 29    | 0.92 $\pm$ 0.16   |                      | 29    | 1.43 $\pm$ 0.75   |                      | 30       | 11.60 $\pm$ 14.54    |                      |
| <b>Smoking status</b>                       | 291   |                   | 0.84                 | 279   |                   | 0.89                 | 278   |                   | 0.18                 | 291      |                      | 0.037                |
| Nonsmoker                                   | 215   | 12.65 $\pm$ 8.75  |                      | 208   | 0.97 $\pm$ 0.18   |                      | 206   | 1.42 $\pm$ 0.66   |                      | 215      | 8.47 $\pm$ 13.68     |                      |
| Current smoker                              | 76    | 12.89 $\pm$ 9.19  |                      | 71    | 0.97 $\pm$ 0.16   |                      | 72    | 1.57 $\pm$ 1.10   |                      | 76       | 15.22 $\pm$ 41.24    |                      |
| <b>Hemoglobin</b>                           | 290   |                   | 0.12                 | 278   |                   | 0.80                 | 278   |                   | 0.19                 | 290      |                      | 0.71                 |
| Sufficient ( $\geq$ 10.5 $\text{g/dL}$ )    | 275   | 12.88 $\pm$ 8.88  |                      | 264   | 0.97 $\pm$ 0.17   |                      | 265   | 1.44 $\pm$ 0.80   |                      | 275      | 10.34 $\pm$ 24.87    |                      |
| Deficient ( $<$ 10.5 $\text{g/dL}$ )        | 15    | 9.21 $\pm$ 7.98   |                      | 14    | 0.98 $\pm$ 0.21   |                      | 13    | 1.74 $\pm$ 0.67   |                      | 15       | 7.90 $\pm$ 6.26      |                      |
| <b>Crowded living conditions</b>            | 291   |                   | 0.18                 | 279   |                   | 0.027                | 278   |                   | 0.39                 | 291      |                      | 0.97                 |
| No ( $\leq$ 1.33 adults/room)               | 142   | 13.42 $\pm$ 8.88  |                      | 137   | 0.95 $\pm$ 0.18   |                      | 136   | 1.41 $\pm$ 0.67   |                      | 142      | 10.18 $\pm$ 21.98    |                      |
| Yes ( $>$ 1.33 adults/room)                 | 149   | 12.04 $\pm$ 8.80  |                      | 142   | 0.99 $\pm$ 0.17   |                      | 142   | 1.50 $\pm$ 0.90   |                      | 149      | 10.29 $\pm$ 26.26    |                      |
| <b>Maternal age (years)</b>                 | 291   |                   | 0.63                 | 279   |                   | 0.90                 | 278   |                   | 0.32                 | 291      |                      | 0.72                 |
| $<$ 20                                      | 16    | 14.13 $\pm$ 7.99  |                      | 16    | 0.97 $\pm$ 0.18   |                      | 15    | 1.51 $\pm$ 0.61   |                      | 16       | 5.08 $\pm$ 3.58      |                      |
| 20-24                                       | 107   | 11.86 $\pm$ 8.62  |                      | 103   | 0.97 $\pm$ 0.18   |                      | 101   | 1.56 $\pm$ 0.95   |                      | 107      | 10.92 $\pm$ 28.94    |                      |
| 25-29                                       | 97    | 13.09 $\pm$ 9.02  |                      | 92    | 0.98 $\pm$ 0.18   |                      | 94    | 1.35 $\pm$ 0.63   |                      | 97       | 9.14 $\pm$ 16.85     |                      |
| $\geq$ 30                                   | 71    | 13.15 $\pm$ 9.21  |                      | 68    | 0.96 $\pm$ 0.17   |                      | 68    | 1.43 $\pm$ 0.78   |                      | 71       | 11.86 $\pm$ 27.55    |                      |
| <b>Gestational age at blood draw (days)</b> | 291   |                   | 0.022                | 279   |                   | 0.25                 | 278   |                   | 0.71                 | 291      |                      | 0.32                 |
| $<$ 106                                     | 70    | 15.20 $\pm$ 9.29  |                      | 66    | 1.01 $\pm$ 0.17   |                      | 66    | 1.36 $\pm$ 0.83   |                      | 70       | 13.98 $\pm$ 30.91    |                      |
| 106-125                                     | 66    | 12.93 $\pm$ 9.22  |                      | 62    | 0.97 $\pm$ 0.17   |                      | 64    | 1.52 $\pm$ 0.77   |                      | 66       | 9.48 $\pm$ 17.00     |                      |
| 126-145                                     | 79    | 12.20 $\pm$ 8.78  |                      | 76    | 0.95 $\pm$ 0.17   |                      | 74    | 1.49 $\pm$ 0.69   |                      | 79       | 11.05 $\pm$ 32.20    |                      |
| $\geq$ 146                                  | 76    | 10.76 $\pm$ 7.72  |                      | 75    | 0.96 $\pm$ 0.18   |                      | 74    | 1.46 $\pm$ 0.90   |                      | 76       | 6.61 $\pm$ 5.80      |                      |
| <b>Maternal height (cm)</b>                 | 289   |                   | <0.0001              | 277   |                   | 0.058                | 276   |                   | 0.058                | 289      |                      | 0.33                 |
| $<$ 155                                     | 34    | 16.26 $\pm$ 9.67  |                      | 29    | 0.96 $\pm$ 0.16   |                      | 30    | 1.31 $\pm$ 0.56   |                      | 34       | 9.48 $\pm$ 17.53     |                      |
| 155-159                                     | 72    | 16.25 $\pm$ 9.50  |                      | 69    | 0.93 $\pm$ 0.18   |                      | 71    | 1.67 $\pm$ 1.07   |                      | 72       | 13.14 $\pm$ 30.83    |                      |
| 160-164                                     | 121   | 10.30 $\pm$ 7.62  |                      | 119   | 1.00 $\pm$ 0.18   |                      | 117   | 1.38 $\pm$ 0.67   |                      | 121      | 7.39 $\pm$ 12.49     |                      |
| $\geq$ 165                                  | 64    | 11.39 $\pm$ 8.08  |                      | 62    | 0.97 $\pm$ 0.16   |                      | 60    | 1.43 $\pm$ 0.70   |                      | 64       | 12.74 $\pm$ 33.76    |                      |
| <b>Pre-pregnancy weight (kg)</b>            | 289   |                   | 0.77                 | 277   |                   | 0.076                | 276   |                   | 0.47                 | 289      |                      | 0.66                 |
| $<$ 55                                      | 48    | 12.77 $\pm$ 9.77  |                      | 43    | 1.03 $\pm$ 0.18   |                      | 45    | 1.41 $\pm$ 0.54   |                      | 48       | 9.30 $\pm$ 17.54     |                      |
| 55-64                                       | 108   | 13.22 $\pm$ 9.03  |                      | 103   | 0.98 $\pm$ 0.18   |                      | 104   | 1.54 $\pm$ 0.92   |                      | 108      | 8.85 $\pm$ 22.76     |                      |
| 65-74                                       | 86    | 11.89 $\pm$ 8.66  |                      | 86    | 0.95 $\pm$ 0.17   |                      | 84    | 1.44 $\pm$ 0.82   |                      | 86       | 13.00 $\pm$ 32.83    |                      |
| $\geq$ 74                                   | 49    | 12.97 $\pm$ 7.95  |                      | 47    | 0.95 $\pm$ 0.16   |                      | 45    | 1.33 $\pm$ 0.63   |                      | 49       | 9.34 $\pm$ 12.68     |                      |

<sup>a</sup>p-values determined by analysis of variance.

**Table S2.** Unadjusted and adjusted regression coefficients (for free T4, ln-transformed TSH, and ln-transformed TPO Ab) and odds ratios (for TPO Ab  $\geq$  10 IU/mL versus  $<$  10 IU/mL) for associations with ln-transformed mid-pregnancy blood lead concentrations, Pristina and Mitrovica.

| Outcome                        | Unadjusted R <sup>2</sup> (n) | Unadjusted $\beta$ or OR (95% CI) | p-value | Adjusted R <sup>2</sup> (n) | Adjusted $\beta$ or OR (95% CI) <sup>a</sup> | p-value |
|--------------------------------|-------------------------------|-----------------------------------|---------|-----------------------------|----------------------------------------------|---------|
| <b>Pristina</b>                |                               |                                   |         |                             |                                              |         |
| Free T4 (ng/dL)                | 0.0022 (141)                  | -0.023 (-0.11, 0.059)             | 0.58    | 0.23 (139)                  | -0.033 (-0.11, 0.046)                        | 0.41    |
| Ln-TSH ( $\mu$ IU/mL)          | 0.0024 (142)                  | 0.041 (-0.10, 0.18)               | 0.57    | 0.069 (140)                 | 0.054 (-0.91, 0.20)                          | 0.46    |
| Ln-TPO Ab (IU/mL)              | 0.015 (147)                   | -0.22 (-0.53, 0.092)              | 0.17    | 0.070 (147)                 | -0.22 (-0.54, 0.087)                         | 0.16    |
| TPO Ab $\geq$ vs. $<$ 10 IU/mL | 0.00010 (147)                 | 1.1 (0.17, 7.28)                  | 0.92    | 0.061 (147)                 | 1.29 (0.16, 10.52)                           | 0.81    |
| <b>Mitrovica</b>               |                               |                                   |         |                             |                                              |         |
| Free T4 (ng/dL)                | 0.019 (138)                   | -0.060 (-0.13, 0.014)             | 0.11    | 0.17 (138)                  | -0.053 (-0.13, 0.021)                        | 0.16    |
| Ln-TSH ( $\mu$ IU/mL)          | 0.0013 (136)                  | 0.030 (-0.11, 0.17)               | 0.68    | 0.12 (136)                  | 0.062 (-0.080, 0.21)                         | 0.39    |
| Ln-TPO Ab (IU/mL)              | 0.00096 (144)                 | -0.083 (-0.53, 0.36)              | 0.71    | 0.037 (144)                 | -0.12 (-0.57, 0.33)                          | 0.59    |
| TPO Ab $\geq$ vs. $<$ 10 IU/mL | 0.012 (144)                   | 0.54 (0.22, 1.34)                 | 0.19    | 0.044 (144)                 | 0.49 (0.19, 1.26)                            | 0.14    |

<sup>a</sup>Model covariates: Free T4 = height, ethnicity, BMI, fetal gestational age, maternal education, adults per room; TSH = hemoglobin, ethnicity, BMI, fetal gestational age, maternal age; TPO Ab (continuous and dichotomous) = ethnicity, fetal gestational age, maternal age, adults per room
